# Supplementary material for: Molecularly imprinted polymer filter modified with natural polyphenols for extraction of levothyroxine from biological samples
Source: Royal Society of Chemistry journal article supplement (doi:10.1039/d5ay00617a), 2025-01-01
Supplement: d5ay00617a1.pdf [file d5ay00617a1.pdf]

## Supplementary materials

### Molecularly Imprinted Polymer Filter Modified with Natural Polyphenols for Extraction of Levothyroxine from Biological Samples

Fatemeh Yeksan <sup>a</sup>, Tahere Khezeli\*<sup>a</sup>

<sup>a</sup> *Department of Chemistry, Faculty of Science, Ilam University, Ilam, 69315-516, Iran, E-mail:*

*t.khezeli@ilam.ac.ir.*

### Materials and solutions

Levothyroxine, with a purity level exceeding 98%, was procured from Sigma-Aldrich (Germany). Furthermore, the HPLC grade solvents, including acetonitrile, water, ethanol, and methanol were acquired from Merck (Darmstadt, Germany). Sodium chloride (NaCl), hydrochloric acid (HCl), sodium hydroxide (NaOH), potassium permanganate (KMnO<sub>4</sub>), methacrylic acid (MAA), ethylene glycol dimethacrylate (EGDMA), azobisisobutyronitrile (AIBN), polyvinyl pyrrolidone (PVP), lysine and a formaldehyde solution (~30% in water) were also secured from Merck (Darmstadt, Germany).

The stock solution of levothyroxine, featuring a concentration of 100 mg/L, was carefully prepared with ethanol. Following this, a series of working standard solutions were generated by executing precise dilutions of the initial stock solution with deionized water.

### Instrumentation

The HPLC system (Shimadzu, Japan) used for the separation and analysis of levothyroxine is equipped with a UV detector (model SPD-10Avp) operating at a wavelength of 225 nm, a dual solvent pump (model LC-10Avp), and an injection valve (model EIG 001). The chromatographic

separation is facilitated by a KNAUER column (4.6 mm × 150 mm, 5 µm particle size; Eurospher 100-5 C8). The mobile phase, a 50:50 (v/v) mixture of acetonitrile and water, flows steadily at a rate of 0.5 mL/min. An S1122 solvent delivery system from Sykam (Germany) used for passing the solutions of analyte from filters. FT-IR spectroscopy, conducted with a Bruker-vertex 70 model, identified significant functional groups within the MIP structure. X-ray diffraction using a PHILIPS PW1730 diffractometer evaluated the crystallinity of the MIP by examining the obtained diffraction patterns. Additionally, FE-SEM, using a TESCAN MIRA II instrument, captured detailed images of the surface morphology, while EDS analysis provided the elemental composition of MIP.

**Figure caption:**

**Fig. S1.** Pareto plot of CCD ( $X_1$ : pH;  $X_2$ : [NaCl] (%w/v);  $X_3$ : Desorption time (min); L: linear; Q: quadratic).

**Fig. S2.** Desirability functions diagrams of CCD ( $X_1$ : pH;  $X_2$ : [NaCl] (%w/v);  $X_3$ : Desorption time (min)).

**Fig. S3.** HPLC-UV chromatograms of **(A)** levothyroxine standard solution, **(B)** urine blank, **(C)** serum blank and **(D)** spiked serum sample with 100  $\mu\text{g/L}$  of levothyroxine after modified MIP filtration.

**Fig. S4.** Reusability data for modified MIP filter.

**Fig. S5.** Pictogram obtained from BAGI tool.

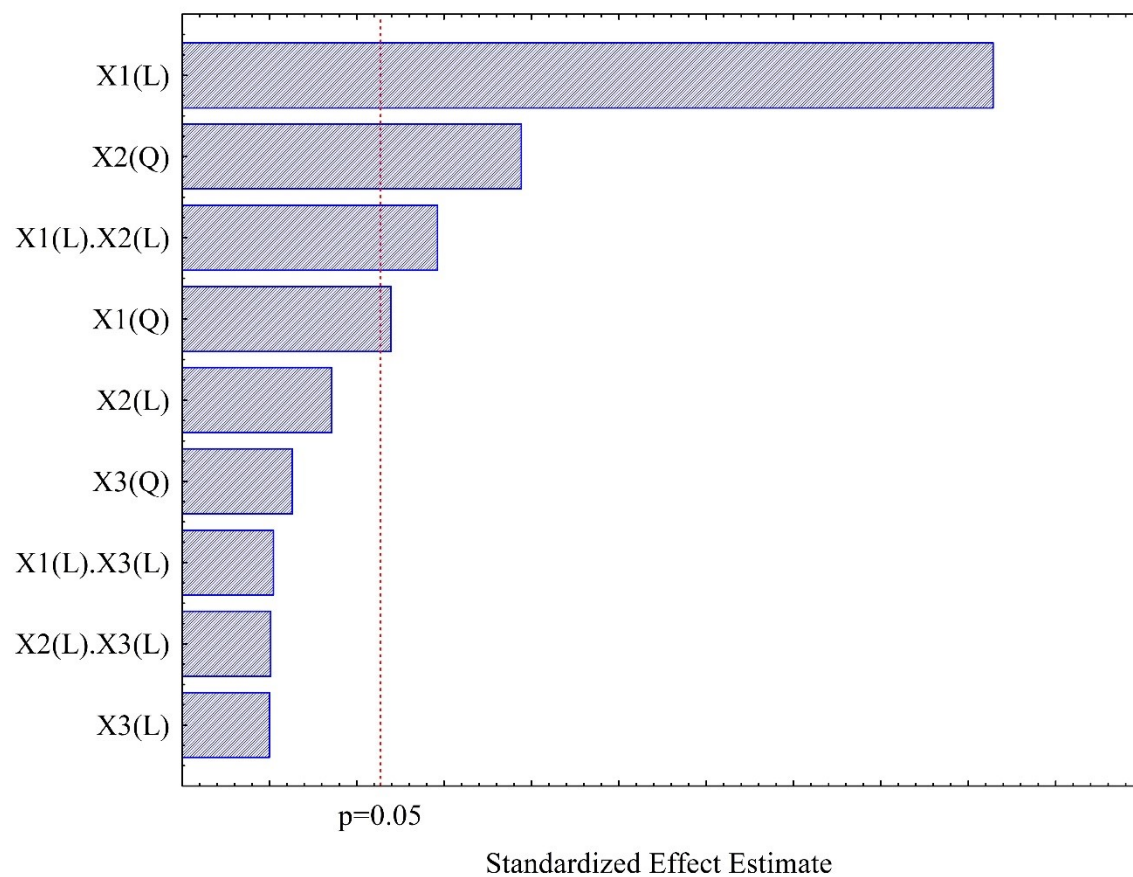

**Fig. S1**

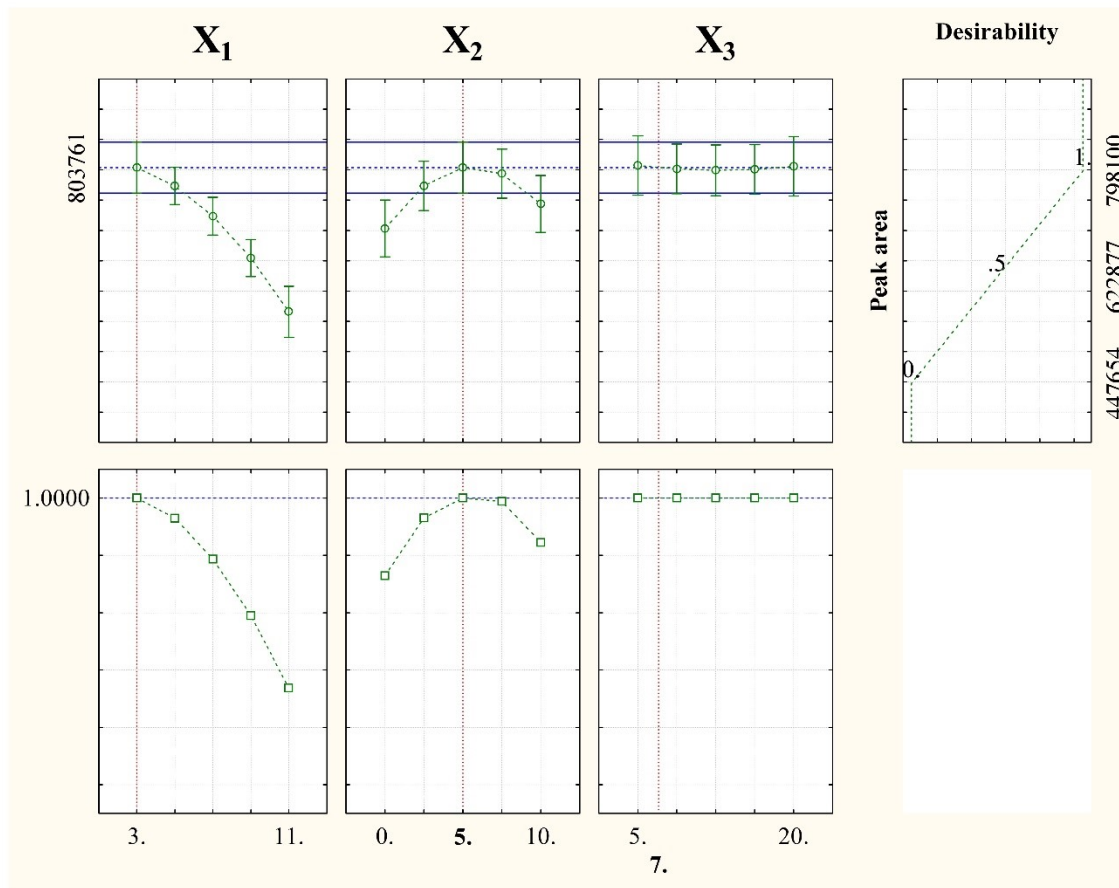

**Fig. S2**

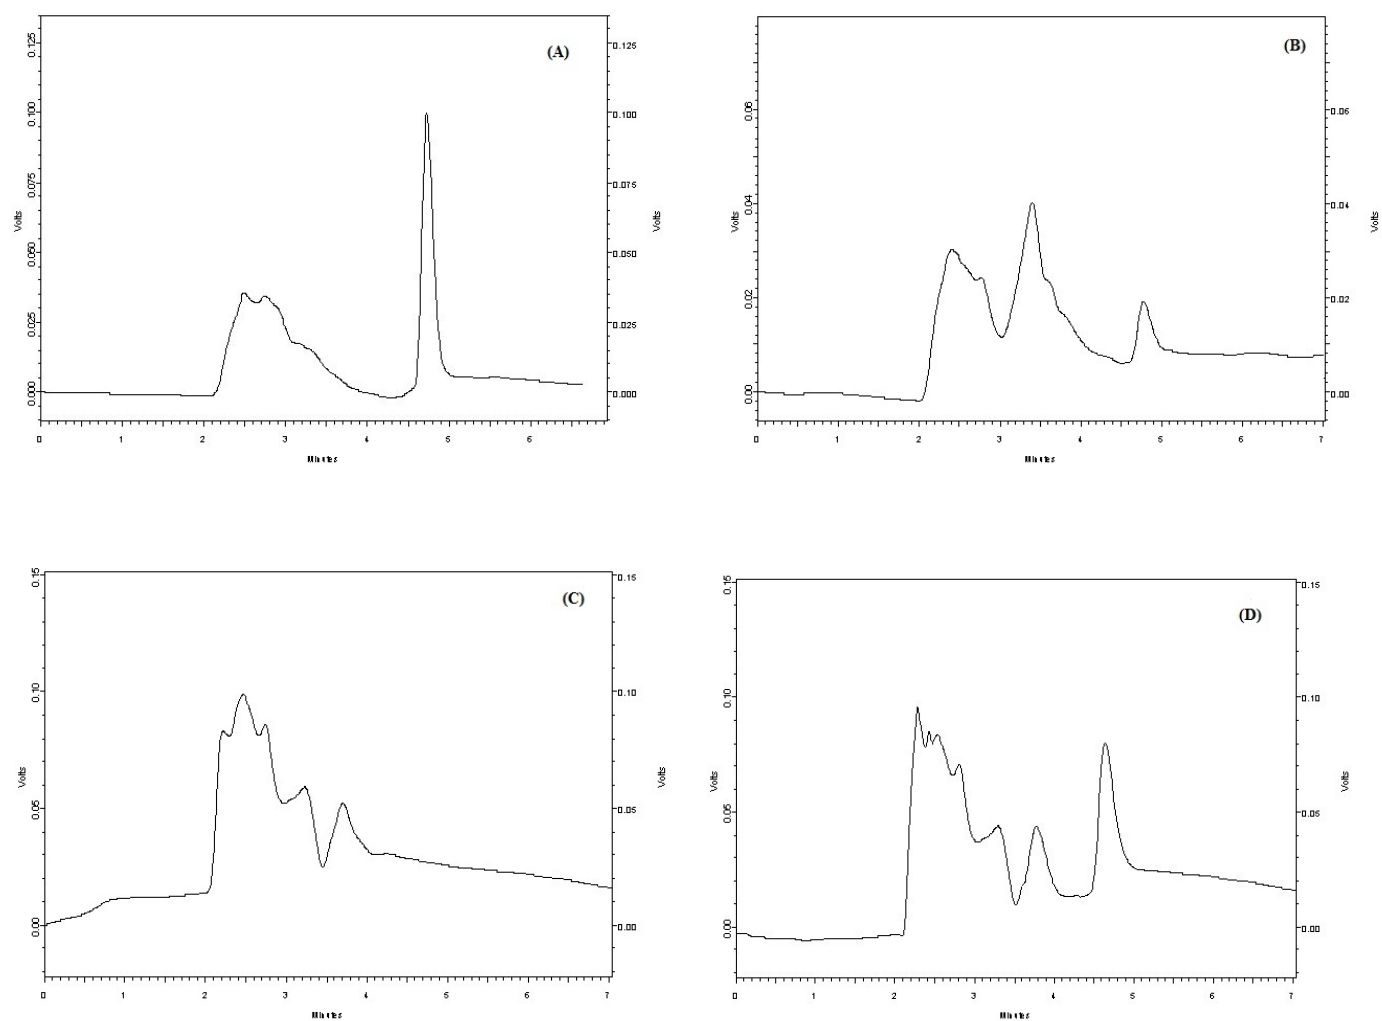

**Fig. S3**

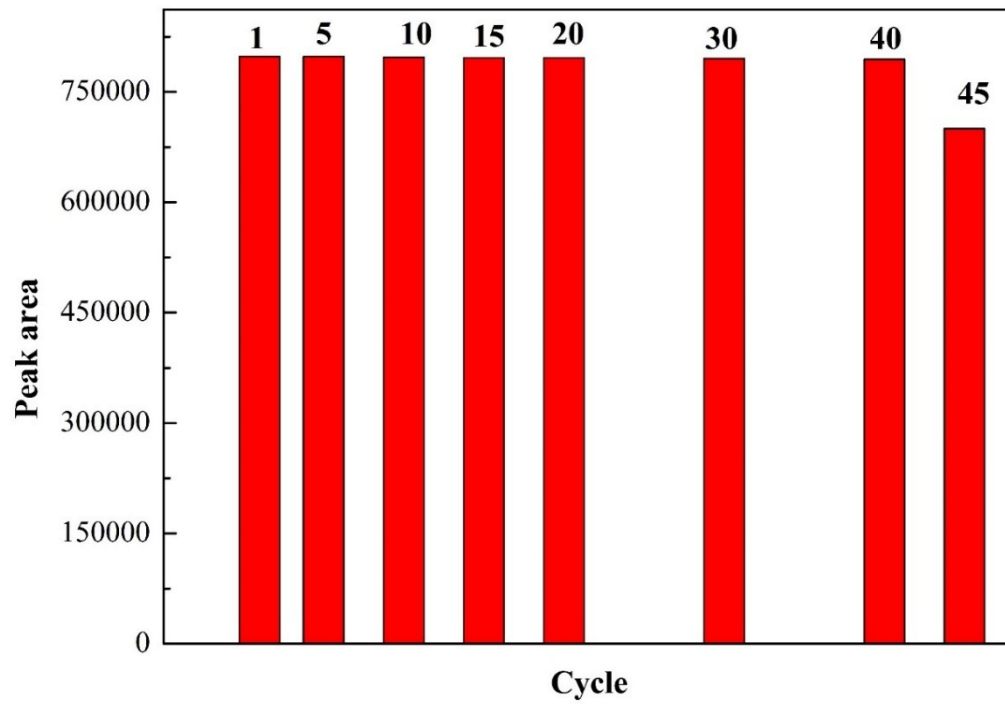

**Fig . S4**

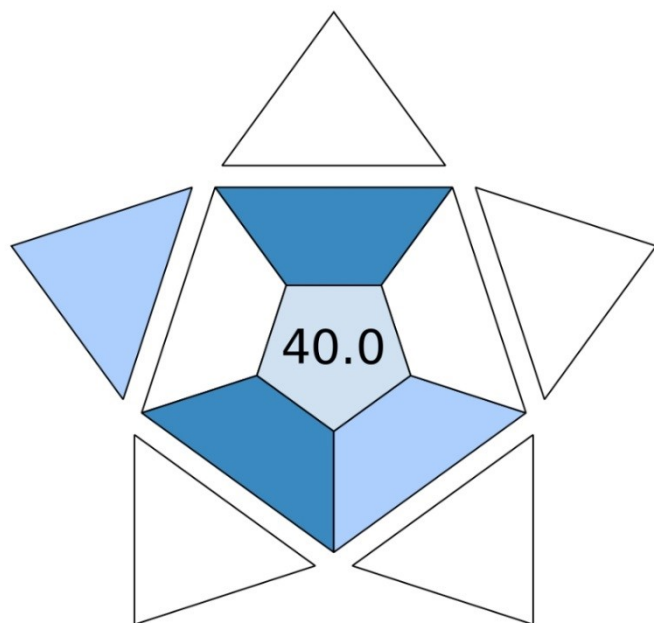

**Fig. S5**



**Table S1** Results of ANOVA study obtained by CCD.

| Factors                               | Statistical parameters |                   |                       |          |          |
|---------------------------------------|------------------------|-------------------|-----------------------|----------|----------|
|                                       | Sum of square          | Degree of freedom | Mean of square        | F-value  | p-Value  |
| X <sub>1</sub> (L) <sup>a</sup>       | 1.40×10 <sup>11</sup>  | 1                 | 1.40×10 <sup>11</sup> | 6862.075 | 0.007685 |
| X <sub>1</sub> (Q) <sup>b</sup>       | 3.96×10 <sup>9</sup>   | 1                 | 3.96×10 <sup>9</sup>  | 194.094  | 0.045617 |
| X <sub>2</sub> (L)                    | 1.03×10 <sup>9</sup>   | 1                 | 1.03×10 <sup>9</sup>  | 50.852   | 0.088696 |
| X <sub>2</sub> (Q)                    | 1.69×10 <sup>10</sup>  | 1                 | 1.69×10 <sup>10</sup> | 831.274  | 0.022072 |
| X <sub>3</sub> (L)                    | 5.56×10 <sup>3</sup>   | 1                 | 5.56×10 <sup>3</sup>  | 0.000    | 0.989489 |
| X <sub>3</sub> (Q)                    | 1.38×10 <sup>8</sup>   | 1                 | 1.38×10 <sup>8</sup>  | 6.779    | 0.233458 |
| X <sub>1</sub> (L)×X <sub>2</sub> (L) | 7.56×10 <sup>9</sup>   | 1                 | 7.56×10 <sup>9</sup>  | 370.072  | 0.033063 |
| X <sub>1</sub> (L)×X <sub>3</sub> (L) | 4.78×10 <sup>6</sup>   | 1                 | 4.78×10 <sup>6</sup>  | 0.234    | 0.713052 |
| X <sub>2</sub> (L)×X <sub>3</sub> (L) | 5.54×10 <sup>5</sup>   | 1                 | 5.54×10 <sup>5</sup>  | 0.027    | 0.896010 |
| LOF                                   | 1.72×10 <sup>8</sup>   | 5                 | 3.44×10 <sup>7</sup>  | 1.685    | 0.524164 |
| Pure Error                            | 2.04×10 <sup>7</sup>   | 1                 | 2.04×10 <sup>7</sup>  |          |          |
| Total SS                              | 1.86×10 <sup>11</sup>  | 15                |                       |          |          |
| R <sup>2</sup>                        | 0.9989                 |                   |                       |          |          |
| R <sup>2</sup> adjusted               | 0.9974                 |                   |                       |          |          |

<sup>a</sup> L (linear); <sup>b</sup> Q (quadratic)

**Table S2** Comparison of modified MIP filter/HPLC-UV method with other methods for determination of levothyroxine.

| Parameter      | Ref. <sup>34</sup><br>( Shah, R. B., et al.2008) | Ref. <sup>35</sup><br>(Rohit,Dutt, et al.2011) | Ref. <sup>36</sup><br>(Permana, Andi Dian, et al.2021) | Ref. <sup>37</sup><br>(AlJamal,Marwa.et al.2023) | This method                 |
|----------------|--------------------------------------------------|------------------------------------------------|--------------------------------------------------------|--------------------------------------------------|-----------------------------|
| Instrument     | HPLC-UV                                          | UPLC-MS/MS                                     | HPLC-UV                                                | Ion Exchange HPLC                                | HPLC-UV                     |
| Method         | Direct injection without complex extraction      | Protein precipitation and LLE                  | Protein precipitation                                  | Dissolution in solvent and filtration            | Modified MIP filter         |
| Liner range    | 2-20 µg/mL                                       | 5.01-300.13 µg/L                               | 0.5-1000 µg/L                                          | 3.5-200 µg/mL                                    | 1-1000 µg/L                 |
| LOD            | 1 µg/mL                                          | 4.9 µg/L                                       | 0.44 µg/L                                              | 0.953 µg/mL                                      | 0.36 (µg/L)                 |
| R <sup>2</sup> | <0.99                                            | ≤0.98                                          | ≤0.998                                                 | <0.999                                           | 0.9999                      |
| RSD %          | <10%                                             | 0.73-8.28                                      | 8.21-9.99                                              | >2                                               | <6.1                        |
| Recovery %     | 95.0-105.0                                       | 49.7-55.5                                      | 80.0-85.0                                              | 98.0-102.0                                       | 98.3-107.7                  |
| Sample         | Levothyroxine dosage form                        | Human serum                                    | Plasma from rats                                       | Levothyroxine dosage form                        | Human urine and blood serum |
